# Supplementary material for: Secreted Ligands of the NK Cell Receptor NKp30: B7-H6 Is in Contrast to BAG6 Only Marginally Released via Extracellular Vesicles
Source: PubMed Central journal article supplement (PMC7926927; doi:10.3390/ijms22042189), 2021-02-22
Supplement: ijms-22-02189-s001.pdf [file ijms-22-02189-s001.pdf]

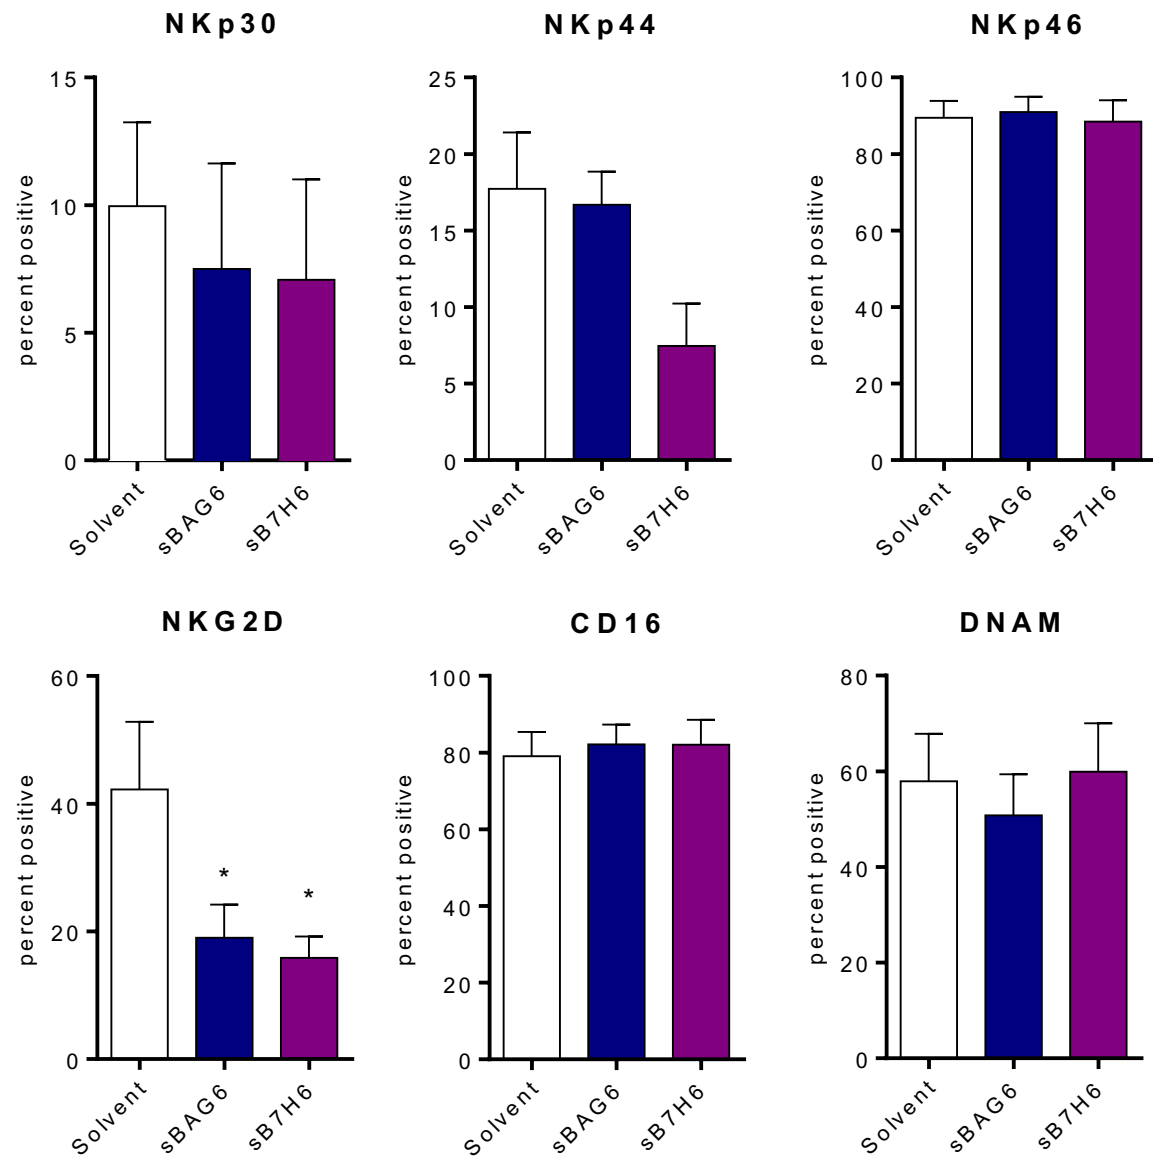

**Figure S1. Percentage NK cell marker expression after treatment with soluble protein.** NK cells were treated with sBAG6 or sB7-H6 for 24 h before cells were collected and NK cell marker expression was measured by flow cytometry. Data are the mean of four to eight experiments  $\pm$  SEM. Statistical significance was calculated using Wilcoxon test,  $*p < 0.05$
